1 **Geographic, environmental, and demographic correlates of central nervous system**  
2 **infections in Lao PDR (2003 – 2011): a retrospective secondary spatial analysis**

3  
4 Sayaphet Rattanavong<sup>1</sup>, Audrey Dubot-Pérès<sup>1,2,3</sup>, Mayfong Mayxay<sup>1,2,4</sup>, Manivanh  
5 Vongsouvath<sup>1</sup>, Sue J Lee<sup>2,5</sup>, Julien Cappelle<sup>6,7,8,9</sup>, Paul N. Newton<sup>1,2,5</sup>, Daniel M. Parker<sup>10,11</sup>  
6  
7  
8

9 Sayaphet Rattanavong: [Sayaphet@tropmedres.ac](mailto:Sayaphet@tropmedres.ac)

10 Audrey Dubot-Pérès: [Audrey@tropmedres.ac](mailto:Audrey@tropmedres.ac)

11 Mayfong Mayxay: [Mayfong@tropmedres.ac](mailto:Mayfong@tropmedres.ac)

12 Manivanh Vongsouvath: [Manivanh@tropmedres.ac](mailto:Manivanh@tropmedres.ac)

13 Sue J Lee: [Sue@tropmedres.ac](mailto:Sue@tropmedres.ac)

14 Julien Cappelle: [Julien.cappelle@cirad.fr](mailto:Julien.cappelle@cirad.fr)

15 Paul N. Newton: [Paul.Newton@tropmedres.ac](mailto:Paul.Newton@tropmedres.ac)

16 \*Daniel M. Parker: [Dparker1@uci.edu](mailto:Dparker1@uci.edu)  
17

18 \*corresponding author  
19

20 1. Lao-Oxford-Mahosot Hospital-Wellcome Trust Research Unit (LOMWRU), Microbiology  
21 Laboratory, Mahosot Hospital, Vientiane, Lao PDR

22 2. Centre for Tropical Medicine and Global Health, Nuffield Department of Clinical Medicine,  
23 University of Oxford, Churchill Hospital, Oxford, U.K.

24 3. Unité des Virus Émergents (UVE: Aix-Marseille Univ – IRD 190 – Inserm 1207 – IHU  
25 Méditerranée Infection), Marseille, France

26 4. Institute of Research and Education Development, University of Health Sciences, Vientiane,  
27 Lao PDR

28 5. Mahidol-Oxford Tropical Medicine Research Unit, Faculty of Tropical Medicine, Mahidol  
29 University, Thailand

30 6. Epidemiology and Public Health Unit, Institut Pasteur du Cambodge, Phnom Penh, Cambodia.

31 7. CIRAD, UMR ASTRE, F-34398, Montpellier, France

32 8. UMR ASTRE, CIRAD, INRA, Montpellier University, F-34398, Montpellier, France.

33 9. UMR EpiA, INRA, VetAgro Sup, F-69280, Marcy l’Etoile, France.

34 10. Department of Population Health and Disease Prevention, University of California, Irvine,  
35 U.S.A.

36 11. Department of Epidemiology, School of Medicine, University of California, Irvine, U.S.A.  
37  
38  
39  
40  
41  
42  
43  
44  
45  
46

47 **ABSTRACT**

48 Central nervous system (CNS) infections are important contributors to morbidity and  
49 mortality worldwide, but the causative agents for ~50% patients are never identified. Here we  
50 present the results of a spatial analysis of CNS infections in Lao PDR (2003 – 2011).  
51 Hospitalizations for suspected CNS infection were recorded at Mahosot Hospital in Vientiane  
52 and tests for a large panel of pathogens were performed. All home villages were geocoded using  
53 patient records and official Lao PDR census data. The spatial distributions of CNS infections  
54 were analyzed by major diagnoses. Summary statistics and logistic regressions were used to test  
55 for associations between geographic, environmental, and demographic variables and diagnoses.  
56 Out of 1,065 patients, 450 (42%) were assigned a confirmed diagnosis. *Japanese encephalitis*  
57 *virus* ((JEV); n=94) and *Cryptococcus* spp. (n=70) were the most common infections. Patients  
58 undergoing diagnostic LP for suspected CNS infections lived closer to major roads than would  
59 be expected by chance alone. JEV was the most spatially dispersed, peaked in the rainy season  
60 and was most common among children. JEV patients came from villages that had higher surface  
61 flooding during the same month as admission and, in comparison to the home villages of other  
62 patients, came from villages at higher elevation. *Cryptococcus* spp. infections clustered near  
63 Vientiane and among adults. Geographic and financial access to healthcare may explain the  
64 close proximity of these patients to major roads and also suggest that these hospital data vastly  
65 underestimate the true community burden of CNS infections. As Lao PDR is undergoing major  
66 developmental and environmental changes, the space-time distributions of the causative agents  
67 of CNS infection will also likely change. There is a major need for increased diagnostic abilities;  
68 increased access to healthcare, especially for rural populations; and for increased surveillance  
69 throughout the nation.

## 70 INTRODUCTION

71 Numerous illnesses go undiagnosed and the causative agents of many infections are never  
72 identified. In regions where access to healthcare facilities is limited and where diagnostic  
73 capabilities are few, a smaller proportion of diseases are objectively diagnosed. Diseases with  
74 mild symptoms may more frequently go untreated, but in some areas even severe illnesses  
75 commonly go undiagnosed and untreated. Infections of the central nervous system (CNS) can be  
76 particularly severe, affecting the brain and/or spinal cord and/or the surrounding meninges,  
77 frequently resulting in death.

78 Pathogens that invade and infect the CNS include viruses, bacteria, fungi, parasites, and  
79 prions. As with other infections, the causative agent(s) of many CNS infections are never  
80 determined (frequently <50%) [1–3]. Symptoms of CNS infection can range widely, even for  
81 single causative agents, leading to further difficulties with diagnosis. Diagnoses are frequently  
82 presumptive and non-specific (i.e. meningitis is often presumed to be caused by bacteria whereas  
83 encephalitis is presumed to be caused viruses [2,4–6]). Some causative agents are specific to  
84 regions (e.g. Japanese Encephalitis, Saint Louis Encephalitis, Rift Valley Fever Viruses) and  
85 exhibit seasonal fluctuations (e.g. vector borne infections), therefore geography and seasonality  
86 can facilitate presumptive diagnosis of CNS diseases [4,7].

87 In Southeast (SE) Asia, CNS infections are increasingly recognized as important  
88 contributors to morbidity and mortality [1,8,9]. However, detailed medical and epidemiological  
89 data are frequently lacking, especially for low income nations and from remote areas within  
90 middle-to-high income nations. Known important viral CNS infections in SE Asia include  
91 Japanese encephalitis, dengue, and rabies viruses [1]. Important bacterial CNS infections include  
92 *Streptococcus pneumoniae*, *Haemophilus influenzae*, *S. suis*, *Mycobacterium tuberculosis* and

93 *Neisseria meningitidis*, *Orientia tsutsugamushi*, *Rickettsia typhi* and *Leptospira* spp. are  
94 increasingly recognized as important causes [9]. Detailed analyses that confirm the cause of CNS  
95 related infections or assess their spatial and temporal distribution in the region are rare [8–11,14].

96 We recently published the results of a study of the etiology and impact of CNS infections  
97 diagnosed among 1,065 patients at Mahosot Hospital, Vientiane, Lao PDR [14]. The goal of this  
98 secondary analysis was to investigate the spatial distribution(s) of CNS-related infections; to  
99 look for differential spatial distributions for major causative agents; and to explore potential  
100 geographic, demographic, and environmental correlates of these infections.

101

## 102 **DATA AND METHODS**

### 103 *Data sources, processing and merging*

104 Data used in this research were compiled from four main sources (**Supporting Figure 1**).  
105 The epidemiological data come from an 8-year research project on CNS infections in Lao PDR  
106 from all patients who received diagnostic lumbar puncture (LP) at Mahosot Hospital in  
107 Vientiane, Lao PDR between January 2003 and August 2011 and consenting to participate [14].  
108 All patients were admitted to the hospital because of suspected CNS infection and Mahosot  
109 Hospital is the only medical facility in Lao PDR capable of performing diagnostic LP and  
110 cerebral spinal fluid (CSF) analysis. Tests for a large panel of pathogens were performed at the  
111 Microbiology Laboratory following international standards (details provided in **Supporting**  
112 **Materials I** and [14]). Demographic (age, gender, ethnicity) and geographic (home village)  
113 characteristics of patients were recorded in the database.

114 The epidemiological data were used to create two separate datasets: One aggregated at  
115 the village level (one row per location) and another was maintained at the individual level, with

116 one row per individual. The official Lao PDR censuses from 2005 and 2015 were used to  
117 geocode villages (based on village name and administrative units listed in patient records) and to  
118 assign village population estimates to each village (taking a mean population size between 2005  
119 and 2015). Village location and population sizes were then merged to both the individual- and  
120 village-level datasets.

121 A subset of villages within the geographic region of the home villages of included  
122 patients was selected by overlaying a standard deviational ellipse with 3 standard deviations  
123 (calculations described in **Supporting Materials II**) around the patient home villages and then  
124 selecting all villages within that ellipse (**Supporting Figure 2**). These villages were then  
125 retained for village level comparisons between villages populated, and not populated, with  
126 patients admitted with CNS disease needing an LP. This subset of villages is hereafter referred to  
127 as the “study area”.

128 Major road network data was taken from OpenStreetMaps  
129 (<http://www.openstreetmap.la>), selecting “primary”, “secondary”, and all major connecting roads  
130 (downloaded in February 2017, **Supporting Figure 3**). Primary and secondary roads are the two  
131 largest road classifications for the nation. Primary roads link major towns and cities and  
132 secondary roads link mid-sized towns. Primary and secondary link roads are ramps or slip roads  
133 that connect other roads to primary or secondary roads. Together, these types of roads are  
134 hereafter referred to as “major roads”. Smaller roads were not included in this analysis as they  
135 are less likely to be accurately included in the OpenStreetMaps data. The Euclidian distance was  
136 then calculated from all villages in the census to the nearest point along a major road. These  
137 distances were merged to both the village- and the individual-level datasets.

138 Environmental predictor variables for vegetation and surface water were derived from  
139 Moderate Resolution Imaging Spectroradiometer (MODIS) products (MOD13Q1/MYD13Q1  
140 250 meter AQUA/TERRA 16 day composites). Since many infectious diseases, especially vector  
141 borne diseases, are strongly influenced by environmental factors we hypothesized that indicators  
142 of vegetation and surface flooding would correlate with some specific diagnoses. Three  
143 environmental indices were downloaded and considered in these analyses: a normalized flooding  
144 index (NFI) [15]; the normalized difference vegetative index (NDVI); and the enhanced  
145 vegetation index (EVI). NFI is indicative of surface water, NDVI is indicative of green surface  
146 vegetation, and EVI is an improved measure of green vegetation that is intended to account for  
147 dense forest canopies and atmospheric conditions that can lead to error in NDVI measurements.  
148 Data were downloaded for each of these environmental indices (EI) within each 16-day time  
149 period from February 2002 through December of 2011. The final analyses conducted in this  
150 research retained only the EVI and NFI for environmental predictors (summary statistics for  
151 NDVI are included) because NDVI and EVI were strongly correlated. The EIs are described in  
152 more detail in **Supporting Materials III**.

153 The environmental raster data were then summarized and extracted based on varying  
154 buffer sizes (2km, 5km, and 10km) for each village in the individual- and village-level datasets.  
155 Permanent water bodies (such as the Mekong River and Nam Ngum Dam) were masked from the  
156 NFI calculations. For the village-level datasets, mean values of each environmental variable was  
157 calculated for the study period duration and used as an indicator of “average” vegetation or  
158 surface water characteristics of each village. For the individual-level dataset the values were  
159 extracted based on the admission date, using increasing durations of time prior to admission  
160 (within the same month, within the previous 2 months, within the previous year).

161 The final datasets include the village-level data, that is a subsample of 98% of all villages  
162 with patients included in the study and the other census designated villages within the same  
163 region (the study area), and the individual level dataset that includes all patients included in the  
164 study. Variables used in this analysis and their descriptions are listed in **Table 1**.

### 165 *Exploratory spatial data analysis*

166 Summary statistics (median; Q1:Q3; mean) were calculated for the distances between  
167 villages and the nearest major road, and aggregated by whether or not the village was home to  
168 included patients and by specific diagnoses. Summary statistics (mean and 95% confidence  
169 intervals) were also calculated for all environmental variables, at each buffer size and temporal  
170 resolution, and for each of the major diagnoses. Tukey's post hoc range test was used to assess  
171 statistically significant differences in environmental indices across diagnoses.

172 Standard distance deviations (SDDs) and standard deviation ellipses (SDEs) were  
173 calculated (**details in Supporting Materials II**) and mapped to measure and visually analyze the  
174 central tendency and spatial distributions for all patient home villages and by each of the major  
175 single (mono-infection) diagnoses.

### 176 *Formal analyses*

177 Multivariable regressions were used to calculate model-adjusted odds ratios and  
178 confidence intervals. The regressions at the village level focused on study patient villages and  
179 the home villages of JEV diagnosed patients. A multivariable regression was also done at the  
180 individual level focusing on JEV infected patients. Other diagnoses were not included in these  
181 analyses because of small numbers of cases per village.

182 Logistic generalized additive models (GAMs) were used for variable selection and  
183 specification (**detailed in Supporting Materials IV and in Table 1**) for the final models. The

184 GAMs were used to examine different specifications of the continuous environmental,  
185 geographic, and demographic variables and for changes in model fit and strength of association  
186 across buffer sizes (i.e. 2km, 5km, or 10km buffers) and for different time durations for EI  
187 measurements (i.e. same month, 2 months prior, 12 months prior to hospital admission). The  
188 final model covariates were chosen based on a combination of *a priori* hypotheses, model fit  
189 (using the Akaike information criterion), and strength of association between the covariate and  
190 the model outcome variable.

191 The final model for the individual-level analysis was a generalized logistic mixed model  
192 with a random effect for home village. The final model for the village-level analysis was a  
193 logistic regression.

#### 194 *Software*

195 All maps were created using QGIS version 3.4.9. R cran version 3.5.2 was used for  
196 downloading, processing, and wrangling MODIS data (using the “MODISStp”; “raster”; “rgdal”;  
197 and “mapproj” packages) and for all regressions. The “mgcv” package was used for GAMs and  
198 the lme4 package was used for the generalized mixed models. Euclidian distances between  
199 villages and major roads were calculated using QGIS. ArcMap version 10.5.1 was used to  
200 calculate SDDs and SDEs.

#### 201 *Ethics approval*

202 Ethical clearance for the CNS study was granted by the Oxford University Tropical  
203 Ethics Research Committee and by the Ethical Review Committee of the Faculty of Medical  
204 Sciences, National University of Laos. Verbal consent (from 2003 – 2006) and written consent  
205 (from 2006 – 2011) were obtained from all recruited patients or immediate relatives.

206



207 **RESULTS**

208 *Summary statistics*

209 A total of 1,065 patients were recruited with no LP contraindications and consented to  
210 have a diagnostic LP; 450 (42%) were assigned a final laboratory diagnosis. The most common  
211 of these were *Japanese encephalitis virus* ((JEV) 94 individuals); followed by *Cryptococcus* spp.  
212 with 70 individuals (9 were *C. gattii*); scrub typhus (*Orientia tsutsugamushi*) 31; *Dengue virus*  
213 27; *Leptospira* spp. 25; murine typhus (*Rickettsia typhi*) 24; *Streptococcus pneumoniae* in 22 and  
214 20 with *Mycobacterium tuberculosis*. 124 patients died prior to discharge (out of 893 with  
215 recorded discharge type recorded).

216 The majority (666, 63%) of patients were male, with the lowest sex bias in cryptococcal  
217 infections (40/70, 57% male) and the highest among dengue infections (22/27, 82% male)  
218 (**Table 2**). Age patterns were evident in JEV and cryptococcal infections, with median ages of 13  
219 and 33 years, respectively (**Table 2**). Patients were linked to 582 different villages (multiple  
220 patients could come from the same village): 90 villages with JEV patients, 66 with cryptococcal  
221 patients, 31 with scrub typhus patients, 27 with dengue patients, 24 with leptospiral patients, and  
222 24 with murine typhus patients. The majority (870, 82%) of patients came from within Vientiane  
223 Prefecture (678, 64%) or Vientiane Province (192, 18%).

224 A total of 6,416 villages (of 10,520 recorded in 2005 [16]) were selected as the study area  
225 for further village level analyses (**Table 3**). Villages that were home to study patients were 11  
226 times (0.7km versus 6.3km, from **Table 3**) closer to a major road when compared to other  
227 villages within the study area. Scrub typhus and JEV infected patient homes were further from  
228 major roads than other patients, but the difference was not statistically significant in univariate  
229 analyses.

230 The home villages of JEV patients were more broadly dispersed (**Figure 1B**) than for  
231 patients with other etiologies (**Figure 1C**), evident from the circular, larger SDE and SDD. The  
232 distribution of these JEV patient home villages was also relatively isotropic, with the SDE and  
233 SDD being nearly identical. Conversely, patients with cryptococcal infections were clustered  
234 near Vientiane City and along the road leading North/Northwest from the urban center (**Figure**  
235 **1C**). Scrub typhus and murine typhus infections were also both clustered around Vientiane City  
236 but showed perpendicular spatial distributions (**Supporting Figures 4D and 4G**) a pattern  
237 previously described from IgG seropositivity data from Vientiane City [17]).

### 238 *Characteristics of patient home villages*

239 Mean NFI values for the 2km radius tended to be higher than for either the 5km or 10km  
240 radius as surface flooding is heterogeneous and taking a mean across larger radii dilutes the  
241 measurement. The opposite pattern was observed for both vegetation indices. The 2km radius for  
242 both mean NDVI and mean EVI was usually smaller than at 5km or 10km radii (**Figures 2 and**  
243 **3**).

244 Study patient villages had higher mean NFI values than non-study patient villages  
245 (**Figure 2A**) (non-study patient villages are those in the same study area as study patient villages  
246 but were not home to a study patient). The home villages of study patients diagnosed with  
247 *dengue virus* and cryptococcal infections had high mean NFI values over the duration of the  
248 study period when compared to other major diagnoses (**Figure 2A**).

249 Conversely, the home villages of study patients tended to have lower mean EVI values  
250 than non-study patient villages (**Figure 2C**). Villages from which patients who were diagnosed  
251 with JEV were an exception to this general pattern. JEV patient home villages had higher mean

252 EVI when compared to home villages of patients with dengue and cryptococcal infections  
253 (**Figure 2C**).

254 Home villages of patients with JEV diagnoses had lower mean NFI over the duration of  
255 the study period, but had higher NFI than other major diagnoses when looking specifically at the  
256 month of admission (especially when compared to cryptococcal infections and murine typhus  
257 (**Figure 3A**)). JEV patient home villages also had higher EVI during the month of admission  
258 than most other mono-infections, especially when compared to either cryptococcal infections or  
259 murine typhus (**Figure 3C**). Scrub typhus infections had higher EVI than cryptococcal infections  
260 when the measurement was taken at the 10km radius buffer (not detectable at smaller radii  
261 (**Figure 3C**)).

262 Home villages of patients with dengue infections had higher NFI than murine typhus or  
263 *Cryptococcus* spp. patient home villages when considering the 2 months prior to admission  
264 (**Figure 3D**). *Cryptococcus* spp. patient home villages had particularly low EVI in the two  
265 months leading up to admission, especially when compared to JEV and *Leptospira* spp. patient  
266 home villages (**Figure 3F**).

267 At one year prior to admission both *Cryptococcus* spp. patient home and *dengue virus* patient  
268 home villages had higher NFI than JEV patient home villages (**Figure 3G**).

### 269 *Logistic regressions for geographic, environmental and demographic predictors of CNS* 270 *infections*

271 In agreement with univariate analyses, villages from which study patients came tended to  
272 be larger in population size (**Supporting Figure 4**), lower in elevation (**Supporting Figure 5**),  
273 and closer to a major road when compared to other villages within the study area (**Table 4**). They  
274 also had higher mean levels of surface flooding, with villages in the highest NFI quadrant having

275 over two times the odds (AOR: 2.21; CI: 1.49 – 3.31) of being a home village for study patients  
276 when compared to neighboring villages in the study area (**Table 4 and Figure 2**). Villages from  
277 which JEV patients originated had few defining characteristics in the logistic regression, other  
278 than being larger in population size (AOR: 1.74; CI: 1.55 – 1.96) and at lower elevations (AOR:  
279 0.69; CI: 0.46 – 0.97) than non-study patient villages (**Table 5**).

280 In the individual-level analysis (**Table 6**), age and season were the strongest predictors of  
281 JEV infections among all patients. Patients who were admitted between July and September had  
282 over seven times the odds (AOR: 7.40; CI: 1.45 – 37.67) of being diagnosed with JEV when  
283 compared to patients who were admitted between January and March (**Table 6**). JEV was most  
284 common in children aged 5 through 14 (AOR: 2.74; CI: 1.31 – 5.69; ages 0 – 4 as the  
285 comparison group). NFI during the month of admission (10km buffer used in the regression) was  
286 also a strong predictor of JEV infection. Individuals who came from villages in the highest  
287 quadrant of NFI measurements had approximately 3 times the odds being diagnosed with JEV  
288 (AOR: 3.06; CI: 1.04 – 8.96). While study patients came from villages with lower mean  
289 elevations, patients who were diagnosed with JEV came from higher elevation villages in  
290 comparison to the other patients (AOR: 1.36; CI: 1.11 – 1.66). EVI was a significant predictor in  
291 models that did not include distance to road, village population, and elevation (**Table 6 M1 and**  
292 **M2**).

293

## 294 **DISCUSSION**

295 Patients from this study were recruited based on symptomology and a medical procedure  
296 that is only available at a single location in the nation (diagnostic LP at Mahosot Hospital,  
297 Vientiane). The home villages of all included study patients, regardless of diagnosis, were

298 approximately centered on Vientiane City and were closer to major roads than would be  
299 expected by chance alone. For many of the infections studied in this analysis, this association is  
300 likely more related to geographic and financial access to healthcare systems rather than exposure  
301 to environmental risk factors – especially for infections that are more associated with rural areas  
302 (e.g. JEV). This finding also suggests that the results here may be a vast underestimate of the true  
303 burden of CNS infections, with much of the Lao population not being in near proximity to a  
304 major road (**Table 3**). The causative agents of CNS infections differ in biology, ecology, and  
305 geography, and this is evident through the spatial distributions of the home villages of patients.  
306 The geographic, environmental, and demographic patterns exhibited by patients needing a  
307 diagnostic LP for suspected CNS infections, and for specific diagnoses, are the result of complex  
308 overlapping factors.

309 A similar spatial pattern was described from an epidemiological analysis of CNS  
310 infections among children admitted to Ho Chi Minh City hospitals in Vietnam – with most  
311 patients coming from districts near the hospital [12]. While the majority of infections (55%) in  
312 the Vietnam study were presumed to be bacterial in origin, in this study from Lao PDR bacterial  
313 infections were identified in only 38% (170 out of 450 patients with diagnoses).

314 JEV was the single largest identified cause of CNS infections in these data; it primarily  
315 affected children (median 13 years of age, **Table 2**), occurred predominantly during the rainy  
316 season (likely corresponding to peaks in mosquito vector populations), and in villages with  
317 recent high levels of surface water [18]. JEV is a vaccine-preventable disease, but the vaccine  
318 has historically been expensive and vaccine programs are frequently limited by access to remote  
319 communities. In 2013 the WHO approved a less expensive vaccine (produced in China by the  
320 Chengdu Institute of Biological Products) which has since been used in mass vaccination

321 campaigns in Lao PDR in 2013 and 2015 [19]. The vaccine is now routinely given to all children  
322 less than 9 months of age but coverage may be low in some areas.

323         The second largest contributor to CNS diseases were cryptococcal infections, which are  
324 opportunistic fungal infections with high mortality [20]. Of the 70 patients with cryptococcal  
325 infections, 12 died prior to discharge and another 8 likely died at home after leaving the hospital.  
326 Cryptococcal infections are generally acquired after inhalation of the yeast-like form of the  
327 fungus which has been associated with several ecological habitats (*Cryptococcus gattii* has been  
328 associated with over 50 species of trees; *Cryptococcus neoformans* has been associated with bird  
329 droppings but is also suspected to be associated with plants [21,22]). This disease has a long  
330 incubation period [23,24] and while *C. gattii* infections commonly occur among  
331 immunocompetent individuals, *C. neoformans* infections are frequently associated with HIV  
332 infections [25,26]. In these data, 20 of the patients diagnosed with cryptococcal infections also  
333 had HIV infections. While several studies have shown that cryptococcal species exist in specific  
334 ecological habitats and have inferred environmental exposure, the long incubation period and  
335 complex natural history likely obfuscate ecological correlations.

336         There are several limitations to this research. Diagnostic LPs are only conducted in  
337 Mahosot Hospital in the national capital. Logistical and financial difficulties in accessing  
338 healthcare facilities, and especially for etiological diagnostic capabilities, likely leads to severe  
339 under-reporting of meningitis, encephalitis, or in the diagnosing the causative agent in these  
340 conditions when the patient does access care. All of these factors ultimately lead to small case  
341 counts for numerous different causative agents. The spatial patterns in points (villages) and  
342 ellipses exhibited in these data are likely influenced by the shape of the nation and it is possible  
343 that the point patterns and ellipses would differ if we had data from neighboring nations. Spatial

344 and temporal patterns that differentiate different infections might be more obvious if the  
345 surveillance system instead focused on any symptomatic infections (rather than only suspected  
346 infections of the CNS). Some pathogens are neurotropic whereas others have tropism for other  
347 organs, while being capable of occasionally infecting the CNS. This may partially explain the  
348 higher case counts of JEV and why we were able to identify spatial, temporal, and environmental  
349 predictors for this causative agent.

350 OpenStreetMaps data are volunteered data and may be prone to error. For this reason we  
351 focused on major roads, whose routes have changed very little over the last decades. For the  
352 regressions, the distances from all villages to the nearest major road was also rounded to the  
353 nearest 5km. Examination of satellite imagery in comparison with the major roads from  
354 OpenStreetMaps suggests that where error does exist, it is on a scale of  $\pm 100$  meters, meaning  
355 that measurements of distances, as used in this analysis, should not be strongly influenced. Some  
356 of these data now come from over a decade ago. Surveillance systems of this type (based on  
357 relatively vague symptomology), with a wide panel of possible contributing causative agents,  
358 and necessary intensive laboratory components are extremely labor and time intensive.

359 Lao PDR is currently undergoing vast environmental, demographic, and economic  
360 changes. Road networks are increasing in range and density and several areas (i.e. Vientiane,  
361 Savannakhet) are undergoing expansive urbanization [27]. These environmental changes will  
362 most likely result in shifting patterns of infectious diseases. As the region undergoes urbanization  
363 (including both a decrease in urban landscape and movement of human populations to urban  
364 centers), pathogens that thrive in rural areas (e.g. JEV) may undergo reduced transmission,  
365 especially if vaccine campaigns are more capable of reaching rural populations. Conversely,

366 infections that cluster in urban and peri-urban areas (such as dengue and murine typhus) may  
367 increase in frequency.

368         Several environmental indices from remote sensing instruments have shown potential for  
369 predicting disease risk, differentiating disease types, or for other surveillance efforts in SE Asia  
370 [28,29] and globally [30–34]. This analysis, and others like it, illustrates the ability to  
371 differentiate some infections (namely JEV when compared to other diagnoses) through the use of  
372 freely available data (i.e. MODIS) and software (R and QGIS) and routinely collected healthcare  
373 data. Surveillance systems and potentially diagnostic algorithms [35] in developing settings  
374 could benefit from inclusion of such resources. A far-reaching surveillance system that is  
375 representative of the entire nation and includes likely CNS infections would be beneficial in  
376 order to assess the true burden of CNS infections – many of which would benefit from primary  
377 and secondary prevention through increased provision of vaccines, vector control, and early  
378 diagnosis and treatment. Given the inherent difficulties in accurately diagnosing and treating  
379 CNS infections, the predictors reported here and from other epidemiological studies for major  
380 contributors to CNS diseases (i.e. age, seasonality, location, and environmental characteristics)  
381 could be considered alongside clinical symptomology when presumptive diagnoses are being  
382 made. However, it will be important to consider current and ongoing demographic,  
383 environmental, and economic changes in Lao PDR.

384         Finally, increasing population access to vaccines, diagnosis, and treatment would have  
385 clear benefits to overall population health. As with other parts of the developing world, a large  
386 fraction of the Lao population must travel long distances in order to reach primary healthcare  
387 centers. In 2005 73% of the Lao population was reported to live in rural areas, 21% without  
388 roads. By 2015 67% of the population were reported to live in rural villages with 8% in villages



389 without roads [36]. For many communities, travel during the wet season remains difficult. Travel  
390 costs can also be prohibitive. Most of the CNS infections in this analysis occurred or developed  
391 symptoms during the wet season. Public health initiatives that help to decrease the distances  
392 between communities and the healthcare services that they need are warranted.

393

### 394 **Acknowledgements**

395 We are very grateful to the patients and to Bounthaphany Bounxouei, past Director of Mahosot  
396 Hospital; to Bounnack Saysanasongkham, Director of Department of Health Care, Ministry of  
397 Health; to H.E. Bounkong Syhavong, Minister of Health, Lao PDR; to the staff of the Infectious  
398 Disease Center and Microbiology Laboratory for their help and support.

### 399 **Funding**

400 This study was supported by the European Commission Innovate program (ComAcross project,  
401 grant no. DCI-ASIE/2013/315-047). The work of LOMWRU, PN and MM are funded by the  
402 Wellcome Trust of Great Britain, grant 106698/Z/14/Z. Travel to Lao PDR to support DMP for  
403 this research was obtained through a University of California Council on Research, Computing,  
404 and Libraries (CORCL) Faculty Grant.

405

### 406 **REFERENCES**

- 407 1. Tarantola A, Goutard F, Newton P, de Lamballerie X, Lortholary O, Cappelle J, et al.  
408 Estimating the Burden of Japanese Encephalitis Virus and Other Encephalitides in  
409 Countries of the Mekong Region. *PLoS Neglected Tropical Diseases*. 2014;8: 4.  
410 doi:10.1371/journal.pntd.0002533
- 411 2. Glaser C a, Honarmand S, Anderson LJ, Schnurr DP, Forghani B, Cossen CK, et al.  
412 Beyond viruses: clinical profiles and etiologies associated with encephalitis. *Clinical*  
413 *infectious diseases : an official publication of the Infectious Diseases Society of America*.  
414 2006;43: 1565–1577. doi:10.1086/509330

- 415 3. Glaser CA, Gilliam S, Schnurr D, Forghani B, Honarmand S, Khetsuriani N, et al. In  
416 Search of Encephalitis Etiologies: Diagnostic Challenges in the California Encephalitis  
417 Project, 1998–2000. *Clinical Infectious Diseases*. 2003;36: 731–742. doi:10.1086/367841
- 418 4. Solomon T, Michael BD, Smith PE, Sanderson F, Davies NWS, Hart IJ, et al. Management  
419 of suspected viral encephalitis in adults – Association of British Neurologists and British  
420 Infection Association National Guidelines. *Journal of Infection*. 2012;64: 347–373.  
421 doi:10.1016/j.jinf.2011.11.014
- 422 5. McGill F, Heyderman RS, Michael BD, Defres S, Beeching NJ, Borrow R, et al. The UK  
423 joint specialist societies guideline on the diagnosis and management of acute meningitis and  
424 meningococcal sepsis in immunocompetent adults. *Journal of Infection*. 2016;72: 405–438.  
425 doi:10.1016/j.jinf.2016.01.007
- 426 6. Bharucha T, Vickers S, Ming D, Lee SJ, Dubot-Pérès A, de Lamballerie X, et al.  
427 Association between reported aetiology of central nervous system infections and the  
428 speciality of study investigators—a bias compartmental syndrome? *Trans R Soc Trop Med*  
429 *Hyg*. 2017;111: 579–583. doi:10.1093/trstmh/try008
- 430 7. Kennedy PGE. Viral Encephalitis: Causes, Differential Diagnosis, and Management.  
431 *Journal of Neurology, Neurosurgery & Psychiatry*. 2004;75: i10–i15.  
432 doi:10.1136/jnnp.2003.034280
- 433 8. Olsen SJ, Campbell AP, Supawat K, Liamsuwan S, Chotpitayasunondh T, Laptikulthum S,  
434 et al. Infectious Causes of Encephalitis and Meningoencephalitis. 2015;21: 2003–2005.
- 435 9. Dittrich S, Rattanavong S, Lee SJ, Panyanivong P, Craig SB, Tulsiani SM, et al. Orientia,  
436 rickettsia, and leptospira pathogens as causes of CNS infections in Laos: A prospective  
437 study. *The Lancet Global Health*. 2015;3: e104–e112. doi:10.1016/S2214-109X(14)70289-  
438 X
- 439 10. Mai NTH, Phu NH, Nhu LNT, Hong NTT, Hanh NHH, Nguyet LA, et al. Central Nervous  
440 System Infection Diagnosis by Next-Generation Sequencing: A Glimpse Into the Future?  
441 *Open Forum Infect Dis*. 2017;4. doi:10.1093/ofid/ofx046
- 442 11. Turner P, Suy K, Tan LV, Sar P, Miliya T, Hong NTT, et al. The aetiologies of central  
443 nervous system infections in hospitalised Cambodian children. *BMC Infect Dis*. 2017;17.  
444 doi:10.1186/s12879-017-2915-6
- 445 12. Ho NT, Hoang VMT, Le NNT, Nguyen DT, Tran A, Kaki D, et al. A spatial and temporal  
446 analysis of paediatric central nervous system infections from 2005 to 2015 in Ho Chi Minh  
447 City, Vietnam. *Epidemiology and Infection*. 2017;145: 3307–3317.  
448 doi:10.1017/S095026881700228X
- 449 13. Mawuntu AHP, Bernadus JBB, Dhenni R, Wiyatno A, Anggreani R, Feliana, et al.  
450 Detection of central nervous system viral infections in adults in Manado, North Sulawesi,  
451 Indonesia. *PLOS ONE*. 2018;13: e0207440. doi:10.1371/journal.pone.0207440

- 452 14. Dubot-Pérès A, Mayxay M, Phetsouvanh R, Lee SJ, Rattanavong S, Vongsouvath M, et al.  
453 Management of Central Nervous System Infections, Vientiane, Laos, 2003–2011 - Volume  
454 25, Number 5—May 2019 - Emerging Infectious Diseases journal - CDC.  
455 doi:10.3201/eid2505.180914
- 456 15. Boschetti M, Nutini F, Manfron G, Brivio PA, Nelson A. Comparative analysis of  
457 normalised difference spectral indices derived from MODIS for detecting surface water in  
458 flooded rice cropping systems. PLoS ONE. 2014;9. doi:10.1371/journal.pone.0088741
- 459 16. Lao Population and Housing Census 2015: Provisional Report [Internet]. Ministry of  
460 Planning and Investment Lao Statistics Bureau; 2015 Dec p. 64. Available:  
461 <https://lao.unfpa.org/sites/default/files/pub-pdf/Final%20report-editing-English1.pdf>
- 462 17. Vallé J, Thaojaikong T, Moore CE, Phetsouvanh R, Richards AL, Souris M, et al.  
463 Contrasting spatial distribution and risk factors for past infection with scrub typhus and  
464 murine typhus in Vientiane city, Lao PDR. PLoS Neglected Tropical Diseases. 2010;4: 1–  
465 10. doi:10.1371/journal.pntd.0000909
- 466 18. Campbell G, Hills S, Fischer M, Jacobson J, Hoke C, Hombach J, et al. Estimated global  
467 incidence of Japanese encephalitis: Bulletin of the World Health Organization. 2011;89:  
468 766–774. doi:10.2471/BLT.10.085233
- 469 19. UNICEF. Japanese Encephalitis Vaccine Market and Supply Update. 2015;
- 470 20. Slavin MA, Chakrabarti A. Opportunistic fungal infections in the Asia-Pacific region.  
471 Medical Mycology. 2012;50: 18–25. doi:10.3109/13693786.2011.602989
- 472 21. Springer DJ, Chaturvedi V. Projecting global occurrence of *Cryptococcus gattii*. Emerging  
473 Infectious Diseases. 2010;16: 14–20. doi:10.3201/eid1601.090369
- 474 22. Ellis DH, Pfeiffer TJ. Ecology, life cycle, and infectious propagule of *Cryptococcus*  
475 *neoformans*. The Lancet. 1990;336: 923–925. doi:10.1016/0140-6736(90)92283-N
- 476 23. Castrodale LJ, Gerlach RF, Preziosi DE, Frederickson P, Lockhart SR. Prolonged  
477 incubation period for *cryptococcus gattii* infection in cat, Alaska, USA. Emerging  
478 Infectious Diseases. 2013;19: 1034–1035. doi:10.3201/eid1906.130006
- 479 24. Georgi A, Schneemann M, Tintelnot K, Calligaris-Maibach RC, Meyer S, Weber R, et al.  
480 *Cryptococcus gattii* meningoencephalitis in an immunocompetent person 13 months after  
481 exposure. Infection. 2009;37: 370–373. doi:10.1007/s15010-008-8211-z
- 482 25. Wright P, Inverarity D. Human immunodeficiency virus (HIV) related cryptococcal  
483 meningitis in rural Central Thailand-Treatment difficulties and prevention strategies.  
484 Southeast Asian J Trop Med Public Health. 2007;38: 4.
- 485 26. Inverarity D, Bradshaw Q, Wright P, Grant A. The spectrum of HIV-related disease in rural  
486 Central Thailand. Southeast Asian J Trop Med Public Health. 2002;33: 10.

- 487 27. Bank AD. Urban development in the Greater Mekong Subregion. Steinberg F, Hakim J,  
488 editors. Mandaluyong City, Philippines: Asian Development Bank; 2016.  
489 doi:10.1111/j.1467-9787.2010.00709.x
- 490 28. Ledien J, Sorn S, Hem S, Huy R, Buchy P, Tarantola A, et al. Assessing the performance of  
491 remotely-sensed flooding indicators and their potential contribution to early warning for  
492 leptospirosis in Cambodia. Schumann GJ-P, editor. PLOS ONE. 2017;12: e0181044.  
493 doi:10.1371/journal.pone.0181044
- 494 29. Chadsuthi S, Chalvet-Monfray K, Wiratsudakul A, Suwancharoen D, Cappelle J. A  
495 remotely sensed flooding indicator associated with cattle and buffalo leptospirosis cases in  
496 Thailand 2011–2013. BMC Infectious Diseases. 2018;18. doi:10.1186/s12879-018-3537-3
- 497 30. Rogers DJ, Randolph SE, Snow RW, Hay SI. Satellite imagery in the study and forecast of  
498 malaria. Nature. 2002;415: 710–715. doi:10.1038/415710a
- 499 31. Lambin EF, Tran A, Vanwambeke SO, Linard C, Soti V. Pathogenic landscapes:  
500 Interactions between land, people, disease vectors, and their animal hosts. International  
501 Journal of Health Geographics. 2010;9: 54. doi:10.1186/1476-072X-9-54
- 502 32. Beck LR, Lobitz BM, Wood BL. Remote sensing and human health: new sensors and new  
503 opportunities. Emerg Infect Dis. 2000;6: 217–227.
- 504 33. Ford TE, Colwell RR, Rose JB, Morse SS, Rogers DJ, Yates TL. Using Satellite Images of  
505 Environmental Changes to Predict Infectious Disease Outbreaks. Emerg Infect Dis.  
506 2009;15: 1341–1346. doi:10.3201/eid1509.081334
- 507 34. Lleo MM, Lafaye M, Guell A. Application of space technologies to the surveillance and  
508 modelling of waterborne diseases. Curr Opin Biotechnol. 2008;19: 307–312.  
509 doi:10.1016/j.copbio.2008.04.001
- 510 35. Pokharel S, White LJ, Aguas R, Celhay O, Pellé KG, Dittrich S. Algorithm in the diagnosis  
511 of febrile illness using pathogen-specific rapid diagnostic tests. Clin Infect Dis.  
512 doi:10.1093/cid/ciz665
- 513 36. Results of the Population and Housing Census 2015 [Internet]. Lao Statistics Bureau; 2016  
514 p. 282. Available: <https://lao.unfpa.org/sites/default/files/pub-pdf/PHC-ENG-FNAL->  
515 [WEB\\_0.pdf](https://lao.unfpa.org/sites/default/files/pub-pdf/PHC-ENG-FNAL-WEB_0.pdf)
- 516 37. Leparc-Goffart I, Baragatti M, Temmam S, Tuiskunen A, Moureau G, Charrel R, et al.  
517 Development and validation of real-time one-step reverse transcription-PCR for the  
518 detection and typing of dengue viruses. J Clin Virol. 2009;45: 61–66.  
519 doi:10.1016/j.jcv.2009.02.010
- 520 38. Moureau G, Temmam S, Gonzalez JP, Charrel RN, Grard G, de Lamballerie X. A real-time  
521 RT-PCR method for the universal detection and identification of flaviviruses. Vector Borne  
522 Zoonotic Dis. 2007;7: 467–477. doi:10.1089/vbz.2007.0206

- 523 39. Moureau G, Ninove L, Izri A, Cook S, De Lamballerie X, Charrel RN. Flavivirus RNA in  
524 phlebotomine sandflies. *Vector Borne Zoonotic Dis.* 2010;10: 195–197.  
525 doi:10.1089/vbz.2008.0216
- 526 40. Jiang J, Chan T-C, Temenak JJ, Dasch GA, Ching W-M, Richards AL. Development of a  
527 quantitative real-time polymerase chain reaction assay specific for *Orientia tsutsugamushi*.  
528 *Am J Trop Med Hyg.* 2004;70: 351–356.
- 529 41. Jiang J, Stromdahl EY, Richards AL. Detection of *Rickettsia parkeri* and *Candidatus*  
530 *Rickettsia andeanae* in *Amblyomma maculatum* Gulf Coast Ticks Collected from Humans  
531 in the United States. *Vector-Borne and Zoonotic Diseases.* 2011;12: 175–182.  
532 doi:10.1089/vbz.2011.0614
- 533 42. Phetsouvanh R, Blacksell SD, Jenjaroen K, Day NPJ, Newton PN. Comparison of Indirect  
534 Immunofluorescence Assays for Diagnosis of Scrub Typhus and Murine Typhus Using  
535 Venous Blood and Finger Prick Filter Paper Blood Spots. *The American Journal of*  
536 *Tropical Medicine and Hygiene.* 2009;80: 837–840. doi:10.4269/ajtmh.2009.80.837
- 537 43. Thaipadunpanit J, Chierakul W, Wuthiekanun V, Limmathurotsakul D, Amornchai P,  
538 Boonslip S, et al. Diagnostic Accuracy of Real-Time PCR Assays Targeting 16S rRNA and  
539 *lipI32* Genes for Human Leptospirosis in Thailand: A Case-Control Study. *PLOS ONE.*  
540 2011;6: e16236. doi:10.1371/journal.pone.0016236
- 541 44. Cole JR, Sulzer CR, Pursell AR. Improved Microtechnique for the Leptospiral Microscopic  
542 Agglutination Test1. *Appl Microbiol.* 1973;25: 976–980.
- 543 45. Mitchell A. *The ESRI Guide to GIS Analysis.* ESRI Press; 2005.
- 544 46. Levine N. *Spatial Distribution. CrimeStat III: a spatial statistics program for the analysis of*  
545 *crime incident locations (version 30).* Houston, TX; Washington DC: Ned Levine &  
546 Associates; National Institute of Justice; 2004. Available:  
547 [https://www.nij.gov/topics/technology/maps/documents/crimestat-](https://www.nij.gov/topics/technology/maps/documents/crimestat-files/CrimeStat%20IV%20Chapter%204.pdf)  
548 [files/CrimeStat%20IV%20Chapter%204.pdf](https://www.nij.gov/topics/technology/maps/documents/crimestat-files/CrimeStat%20IV%20Chapter%204.pdf)
- 549 47. Rouse J, Hass R, Deering D, Sehell J. Monitoring the vernal advancement and  
550 retrogradation (Green wave effect) of natural vegetation [Internet]. 1974 p. 8. Report No.:  
551 E74-10676, NASA-CR-139243, PR-7. Available:  
552 <https://ntrs.nasa.gov/archive/nasa/casi.ntrs.nasa.gov/19740022555.pdf>
- 553 48. Huete AR. A soil-adjusted vegetation index (SAVI). *Remote Sensing of Environment.*  
554 1988;25: 295–309. doi:10.1016/0034-4257(88)90106-X
- 555 49. Huete A, Didan K, Miura T, Rodriguez E, Gao X, Ferreira L. Overview of the radiometric  
556 and biophysical performance of the MODIS vegetation indices. *Remote Sensing of*  
557 *Environment.* 2002;83: 195–213. doi:10.1016/S0034-4257(02)00096-2
- 558 50. Hale GM, Querry MR. Optical Constants of Water in the 200-nm to 200- $\mu$ m Wavelength  
559 Region. *Appl Opt, AO.* 1973;12: 555–563. doi:10.1364/AO.12.000555

- 560 51. Boschetti M, Nutini F, Manfron G, Brivio PA, Nelson A. Comparative Analysis of  
561 Normalised Difference Spectral Indices Derived from MODIS for Detecting Surface Water  
562 in Flooded Rice Cropping Systems. Schumann GJ-P, editor. PLoS ONE. 2014;9: e88741.  
563 doi:10.1371/journal.pone.0088741

564

565

566

567

568

569

570

571

572

573

574

575

576

577

578

579

580

581

582

583

584

585

586 **Table 1:** List of variables, their spatial and temporal scales, and transformations

587

| Variable                      | description                                                                                                                                                                                                                                                                           | spatial scale                                                                                                                    | temporal scale                                                                                                                                                                                                                                                                                            | transformation                                                                                                    |
|-------------------------------|---------------------------------------------------------------------------------------------------------------------------------------------------------------------------------------------------------------------------------------------------------------------------------------|----------------------------------------------------------------------------------------------------------------------------------|-----------------------------------------------------------------------------------------------------------------------------------------------------------------------------------------------------------------------------------------------------------------------------------------------------------|-------------------------------------------------------------------------------------------------------------------|
| <i>Village population</i>     | Population estimate of LP patient home village. This is calculated as a mean population value from the Lao PDR official census from years 2005 and 2015.                                                                                                                              |                                                                                                                                  |                                                                                                                                                                                                                                                                                                           | For multivariable regressions, this variable was centered on its mean and standardized by its standard deviation. |
| <i>Distance to major road</i> | This is the distance in meters from the LP patient home village and the nearest point on a major highway network, from the OpenStreetMaps map layer. This distance was transformed into kilometers and rounded to the nearest 5 kilometers in order to account for measurement error. | This distance was transformed into kilometers and rounded to the nearest 5 kilometers in order to account for measurement error. |                                                                                                                                                                                                                                                                                                           | For multivariable regressions, this variable was centered on its mean and standardized by its standard deviation. |
| <i>Village elevation</i>      | This is the elevation of the LP patient home village, calculated from a digital elevation model. It is in meters above sea level.                                                                                                                                                     | at village point                                                                                                                 |                                                                                                                                                                                                                                                                                                           | For multivariable regressions, this variable was centered on its mean and standardized by its standard deviation. |
| <i>NFI</i>                    | This is the normalized flooding index, described in detail in the Supporting materials.                                                                                                                                                                                               | Mean values at 2km, 5km, and 10km buffers around each village.                                                                   | For village level analysis: calculated as a mean value for the study duration. For individual level analysis: Calculated for the same month (same 16 day time period); the previous 2 months (mean of the previous 5 16 day intervals); and the previous year (mean of the previous 23 16 day intervals). | Aggregated into quartiles for multivariable regressions.                                                          |
| <i>NDVI</i>                   | This is the normalized difference vegetation index, detailed in the Supporting materials.                                                                                                                                                                                             | Mean values at 2km, 5km, and 10km buffers around each village.                                                                   | For village level analysis: calculated as a mean value for the study duration. For individual level analysis: Calculated for the same month (same 16 day time period); the previous 2 months (mean of the previous 5 16 day intervals); and the previous year (mean of the previous 23 16 day intervals). |                                                                                                                   |
| <i>EVI</i>                    | This is the enhanced vegetation index, detailed in the Supporting materials.                                                                                                                                                                                                          | Mean values at 2km, 5km, and 10km buffers around each village.                                                                   | For village level analysis: calculated as a mean value for the study duration. For individual level analysis: Calculated for the same month (same 16 day time period); the previous 2 months (mean of the previous 5 16 day intervals); and the previous year (mean of the previous 23 16 day intervals). | Aggregated into quartiles for multivariable regressions.                                                          |
| <i>Gender</i>                 | Binary for male or female, self reported in hospital records                                                                                                                                                                                                                          |                                                                                                                                  |                                                                                                                                                                                                                                                                                                           |                                                                                                                   |
| <i>Age</i>                    | Self reported age in years.                                                                                                                                                                                                                                                           |                                                                                                                                  |                                                                                                                                                                                                                                                                                                           | Aggregated into age groups for multivariable                                                                      |
| <i>Year</i>                   | The year of admission to the hospital                                                                                                                                                                                                                                                 |                                                                                                                                  |                                                                                                                                                                                                                                                                                                           | For multivariable regressions, this variable was centered on its mean and standardized by its standard deviation. |
| <i>Quarter</i>                | The calendar quarter of admission (Jan - March; Apr - June; July - Sep; Oct - Dec)                                                                                                                                                                                                    |                                                                                                                                  |                                                                                                                                                                                                                                                                                                           |                                                                                                                   |

588

589

590

591

592

593

594

595

596 **Table 2:** Age and gender of study patients. (Q1 and Q3 indicate the first and third quartiles,  
597 respectively).

598

|                                  | male/female | M/F ratio | median age in years (Q1 - Q3) | Total number |
|----------------------------------|-------------|-----------|-------------------------------|--------------|
| <b>all patients</b>              | 666/399     | 1.67      | 23 (8 - 38)                   | 1065         |
| <b>JEV</b>                       | 55/39       | 1.41      | 13 (8 - 20)                   | 94           |
| <b><i>Cryptococcus</i> spp.</b>  | 40/30       | 1.33      | 33 (27 - 41)                  | 70           |
| <b>scrub typhus</b>              | 22/9        | 2.44      | 16 (9 - 29)                   | 31           |
| <b><i>Dengue virus</i></b>       | 22/5        | 4.4       | 20 (9 - 30)                   | 27           |
| <b><i>Leptospirosis</i> spp.</b> | 17/8        | 2.13      | 25 (12 - 39)                  | 25           |
| <b>murine typhus</b>             | 17/7        | 2.43      | 32 (16 - 51)                  | 24           |

599

600

601

602

603 **Table 3:** Distribution of distances (in km) to the nearest major road, by diagnosis type. Counts of  
604 villages are from within 3 standard deviational ellipses (SDEs) of all LP villages (referred to as  
605 the “study area” in text). In some cases, multiple patients came from the same village meaning  
606 that counts of villages will be smaller than counts of total patients. (Q1 and Q3 indicate the first  
607 and third quartiles, respectively).

608

|                                       | n    | median distance in km (Q1 - Q3) |
|---------------------------------------|------|---------------------------------|
| <b>All</b>                            | 6416 | 5.4 (0.5 - 15.2)                |
| <b>Villages without study patient</b> | 5847 | 6.3 (0.8 - 16.1)                |
| <b>Villages with study patient</b>    | 569  | 0.7 (0.1 - 4.1)                 |
| <b>JEV</b>                            | 88   | 0.6 (0.1 - 8.0)                 |
| <b><i>Cryptococcus</i> spp.</b>       | 66   | 0.3 (0.1 - 1.4)                 |
| <b>scrub typhus</b>                   | 31   | 0.6 (0.2 - 3.5)                 |
| <b><i>Dengue virus</i></b>            | 27   | 0.3 (0.1 - 1.1)                 |
| <b><i>Leptospirosis</i> spp.</b>      | 22   | 0.4 (0.1 - 1.9)                 |
| <b>murine typhus</b>                  | 24   | 0.3 (0.1 - 2.2)                 |

609



610 **Table 4:** Logistic regression and model adjusted odds ratios (AOR) for village level analysis of  
611 LP villages

612

| covariate              | total | LP count | AOR (CI)                  |
|------------------------|-------|----------|---------------------------|
| NDFI Q1                | 1604  | 68       | reference group           |
| NDFI Q2                | 1604  | 75       | 1.07 (0.73 - 1.56)        |
| NDFI Q3                | 1604  | 130      | <b>1.48 (1.03 - 2.16)</b> |
| NDFI Q4                | 1604  | 296      | <b>2.21 (1.49 - 3.31)</b> |
| EVI Q1                 | 1604  | 311      | reference group           |
| EVI Q2                 | 1604  | 134      | 1.16 (0.86 - 1.57)        |
| EVI Q3                 | 1604  | 74       | 1.12 (0.76 - 1.66)        |
| EVI Q4                 | 1604  | 50       | 1.19 (0.74 - 1.91)        |
| Village population     |       |          | <b>2.22 (2.03 - 2.42)</b> |
| Elevation              |       |          | <b>0.52 (0.42 - 0.63)</b> |
| Distance to major road |       |          | <b>0.68 (0.57 - 0.80)</b> |

613

614 **Table 5:** Logistic regression and model adjusted odds ratios (AOR) for village level analysis of  
615 JEV villages

| covariate              | total | JEV count | AOR (CI)                  |
|------------------------|-------|-----------|---------------------------|
| NDFI Q1                | 1604  | 18        | reference group           |
| NDFI Q2                | 1604  | 15        | 0.83 (0.38 - 1.76)        |
| NDFI Q3                | 1604  | 20        | 1.11 (0.53 - 2.35)        |
| NDFI Q4                | 1604  | 35        | 1.26 (0.54 - 2.95)        |
| EVI Q1                 | 1604  | 35        | reference group           |
| EVI Q2                 | 1604  | 23        | 1.81 (0.87 - 3.76)        |
| EVI Q3                 | 1604  | 17        | 1.85 (0.77 - 4.46)        |
| EVI Q4                 | 1604  | 13        | 1.76 (0.63 - 4.93)        |
| Village population     |       |           | <b>1.74 (1.55 - 1.96)</b> |
| Elevation              |       |           | <b>0.69 (0.46 - 0.97)</b> |
| Distance to major road |       |           | 0.88 (0.62 - 1.20)        |

616

617

618

619

620

621 **Table 6:** Mixed effects logistic regression and model adjusted odds ratios (AOR) for individual  
 622 level analysis

|                        |              |                  | <b>M1</b>                  | <b>M2</b>                  | <b>M3</b>                  |
|------------------------|--------------|------------------|----------------------------|----------------------------|----------------------------|
| <b>covariate</b>       | <b>total</b> | <b>JEV count</b> | <b>AOR (CI)</b>            | <b>AOR (CI)</b>            | <b>AOR (CI)</b>            |
| NDFI Q1                | 262          | 7                | reference group            | reference group            | reference group            |
| NDFI Q2                | 261          | 16               | <b>2.91 (1.06 - 7.97)</b>  | 2.28 (0.86 - 6.01)         | 2.32 (0.87 - 6.19)         |
| NDFI Q3                | 261          | 31               | <b>2.73 (1.02 - 7.28)</b>  | <b>2.75 (1.07 - 7.07)</b>  | <b>2.98 (1.13 - 7.85)</b>  |
| NDFI Q4                | 262          | 38               | <b>3.41 (1.17 - 9.94)</b>  | <b>3.12 (1.09 - 8.90)</b>  | <b>3.06 (1.04 - 8.96)</b>  |
| EVI Q1                 | 262          | 8                | reference group            | reference group            | reference group            |
| EVI Q2                 | 261          | 20               | 2.11 (0.84 - 5.28)         | 1.89 (0.76 - 4.74)         | 1.60 (0.63 - 4.04)         |
| EVI Q3                 | 261          | 24               | 2.04 (0.81 - 5.12)         | 1.65 (0.67 - 4.07)         | 1.33 (0.53 - 3.32)         |
| EVI Q4                 | 262          | 40               | <b>4.19 (1.62 - 10.87)</b> | <b>3.44 (1.35 - 8.73)</b>  | 2.43 (0.91 - 6.46)         |
| Jan - March            | 210          | 2                | reference group            | reference group            | reference group            |
| April - June           | 267          | 22               | <b>5.12 (1.10 - 23.89)</b> | 4.45 (0.95 - 20.76)        | <b>5.05 (1.07 - 23.73)</b> |
| July - Sep             | 333          | 62               | <b>8.72 (1.75 - 43.46)</b> | <b>6.35 (1.26 - 31.89)</b> | <b>7.40 (1.45 - 37.67)</b> |
| Oct - Dec              | 253          | 8                | 1.80 (0.35 - 9.25)         | 1.51 (0.29 - 7.81)         | 1.54 (0.29 - 8.17)         |
| Year                   |              |                  | <b>1.31 (1.03 - 1.68)</b>  | <b>1.34 (1.05 - 1.72)</b>  | 1.27 (0.98 - 1.64)         |
| 0 through 4            | 208          | 13               |                            | reference group            | reference group            |
| 5 through 14           | 150          | 37               |                            | <b>3.00 (1.46 - 6.18)</b>  | <b>2.74 (1.31 - 5.69)</b>  |
| 15 through 24          | 192          | 28               |                            | 1.74 (0.84 - 3.62)         | 1.37 (0.64 - 2.94)         |
| 25 through 34          | 186          | 10               |                            | 0.66 (0.27 - 1.61)         | 0.61 (0.25 - 1.48)         |
| 35 through 44          | 133          | 4                |                            | <b>0.26 (0.07 - 0.96)</b>  | <b>0.26 (0.07 - 0.97)</b>  |
| 45 plus                | 196          | 2                |                            | <b>0.11 (0.02 - 0.52)</b>  | <b>0.10 (0.02 - 0.47)</b>  |
| female                 | 399          | 39               |                            | reference group            | reference group            |
| male                   | 666          | 55               |                            | 0.97 (0.60 - 1.58)         | 1.08 (0.66 - 1.79)         |
| Village population     |              |                  |                            |                            | 1.00 (0.77 - 1.29)         |
| Elevation              |              |                  |                            |                            | <b>1.36 (1.11 - 1.66)</b>  |
| Distance to major road |              |                  |                            |                            | 1.08 (0.88 - 1.32)         |

623

624

625

626

627

628

629

630 **Figure 1:** Spatial distributions of the home villages of study patients, for A: all study patients, B:  
631 study patients with JEV infections, and C: with cryptococcal infections, D: scrub typhus  
632 infections, E: with *dengue virus* infections, F: with leptospiral infections, and G: with murine  
633 typhus infections. SDDs and SDEs are weighted by case numbers, with some patients coming  
634 from the same village.

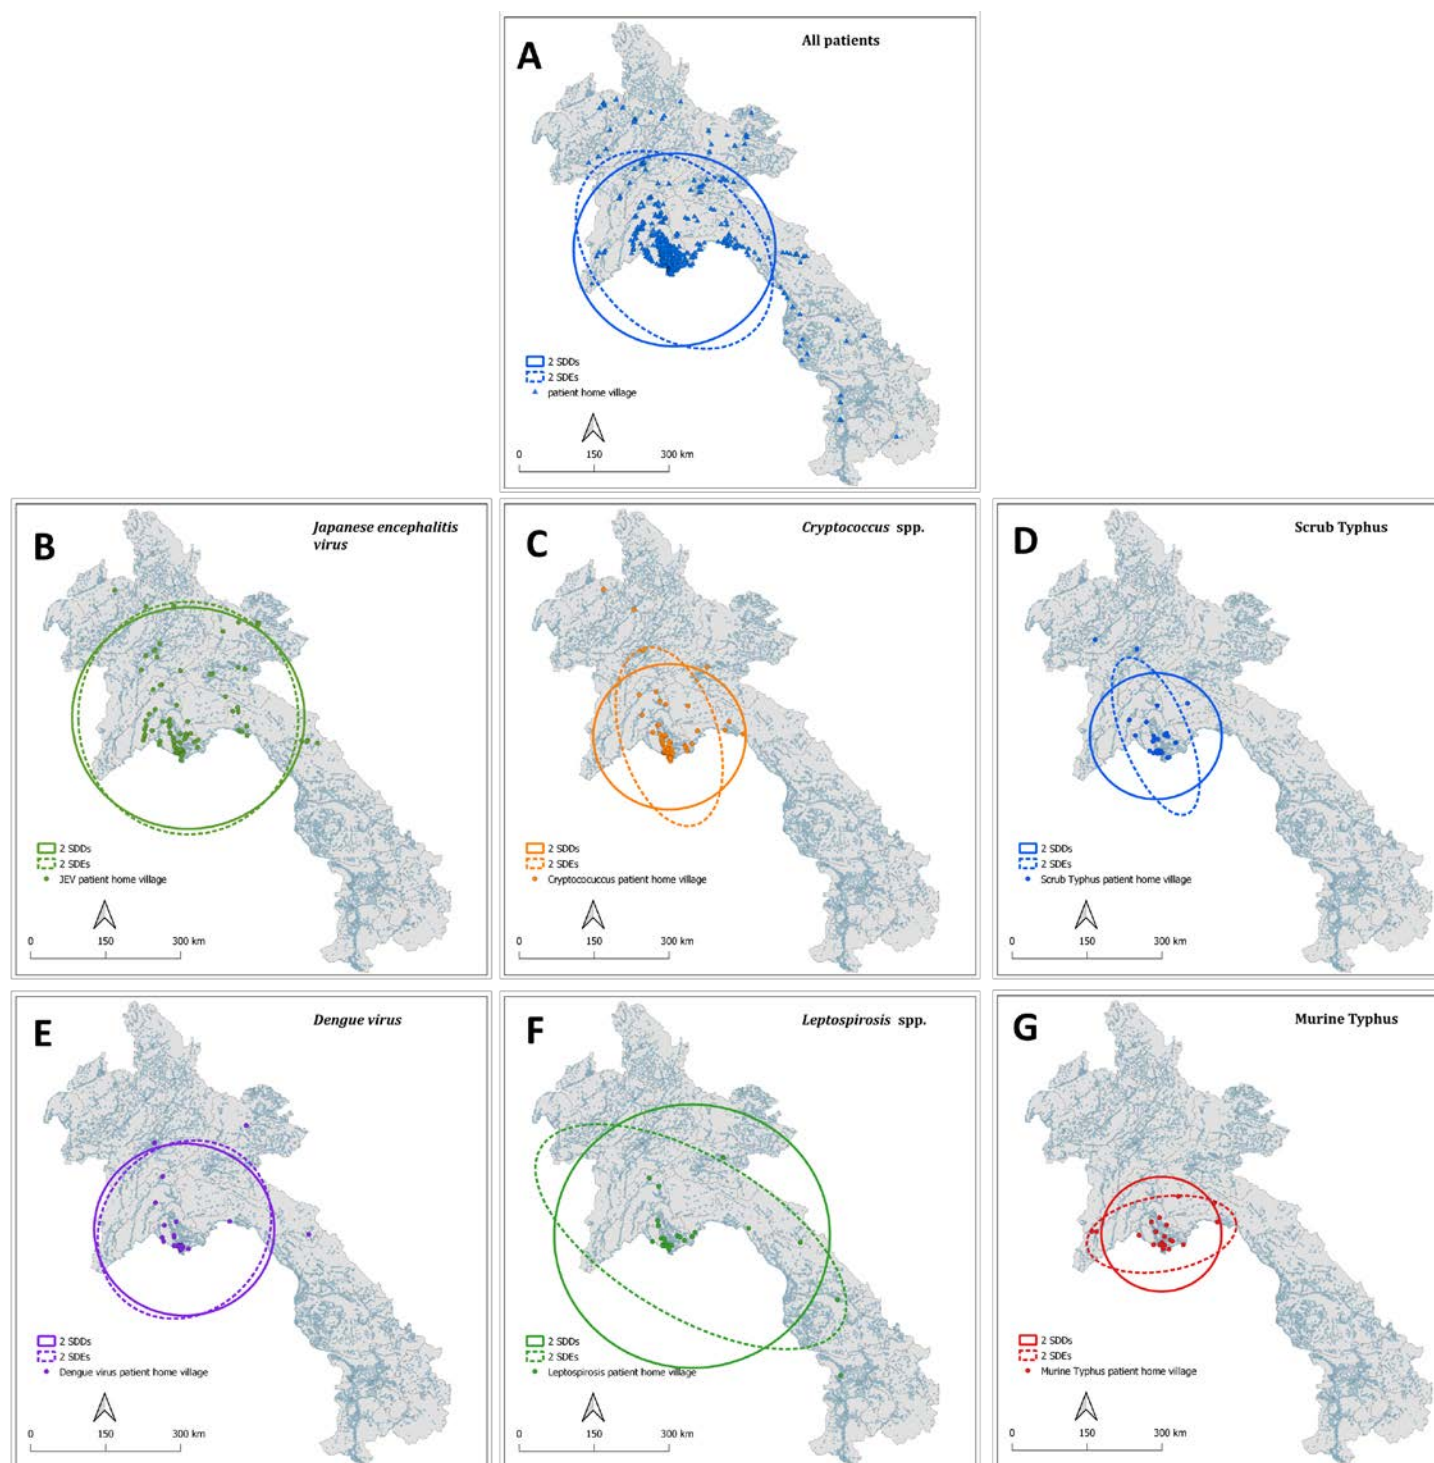

635

636 **Figure 2:** Environmental indices for villages with study patient homes for the duration of the  
637 study period (January 2003 through August 2011) for all study patient villages, non study patient  
638 villages in the study area, and for major diagnoses (JEV = Japanese Encephalitis virus; Crypto =  
639 cryptococcal infection; ST = scrub typhus; MT = murine typhus; dengue = Dengue virus; lepto =  
640 *Leptospira* spp. infection). Bar values are mean values and the error bars are 95% confidence  
641 intervals, using the t-distribution. NFI values here have a constant (0.25) added to them for  
642 visualization only.

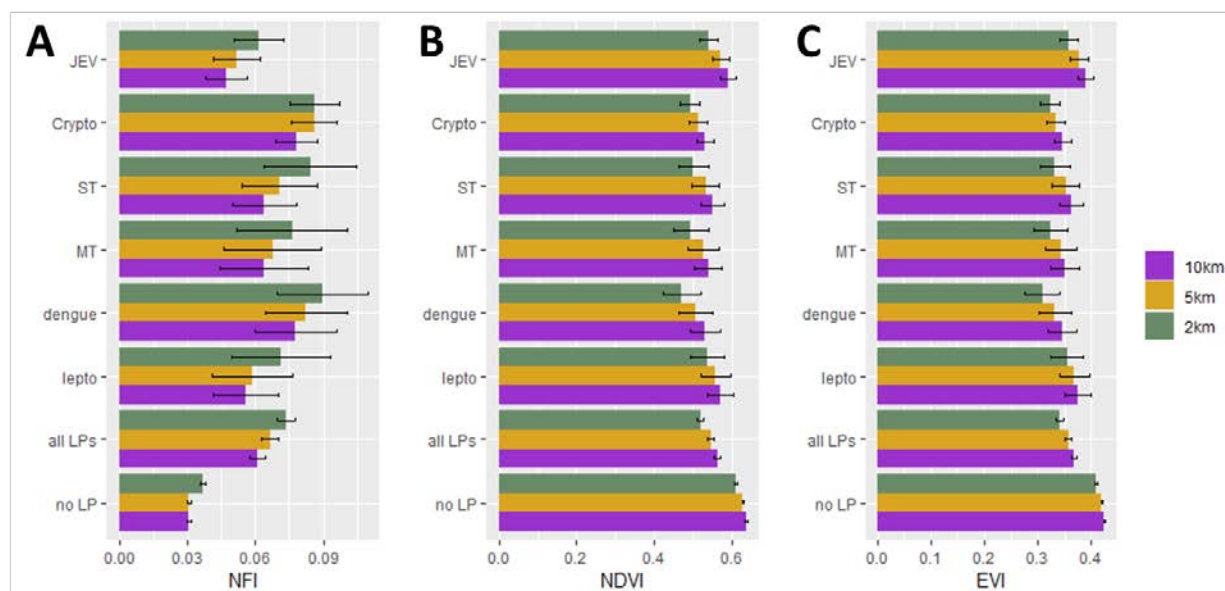

643

644

645

646

647

648

649

650

651

652

653

654

655 **Figure 3:** Environmental indices for study patients by major diagnosis and at different times  
 656 leading up to the date of admission. JEV = Japanese Encephalitis virus; Crypto = cryptococcal  
 657 infection; ST = scrub typhus; MT = murine typhus; dengue = *Dengue virus*; lepto = *Leptospira*  
 658 spp. infection. Bar values are mean values and the error bars are 95% confidence intervals, using  
 659 the t-distribution. NFI values here have a constant (0.25) added to them for visualization only.

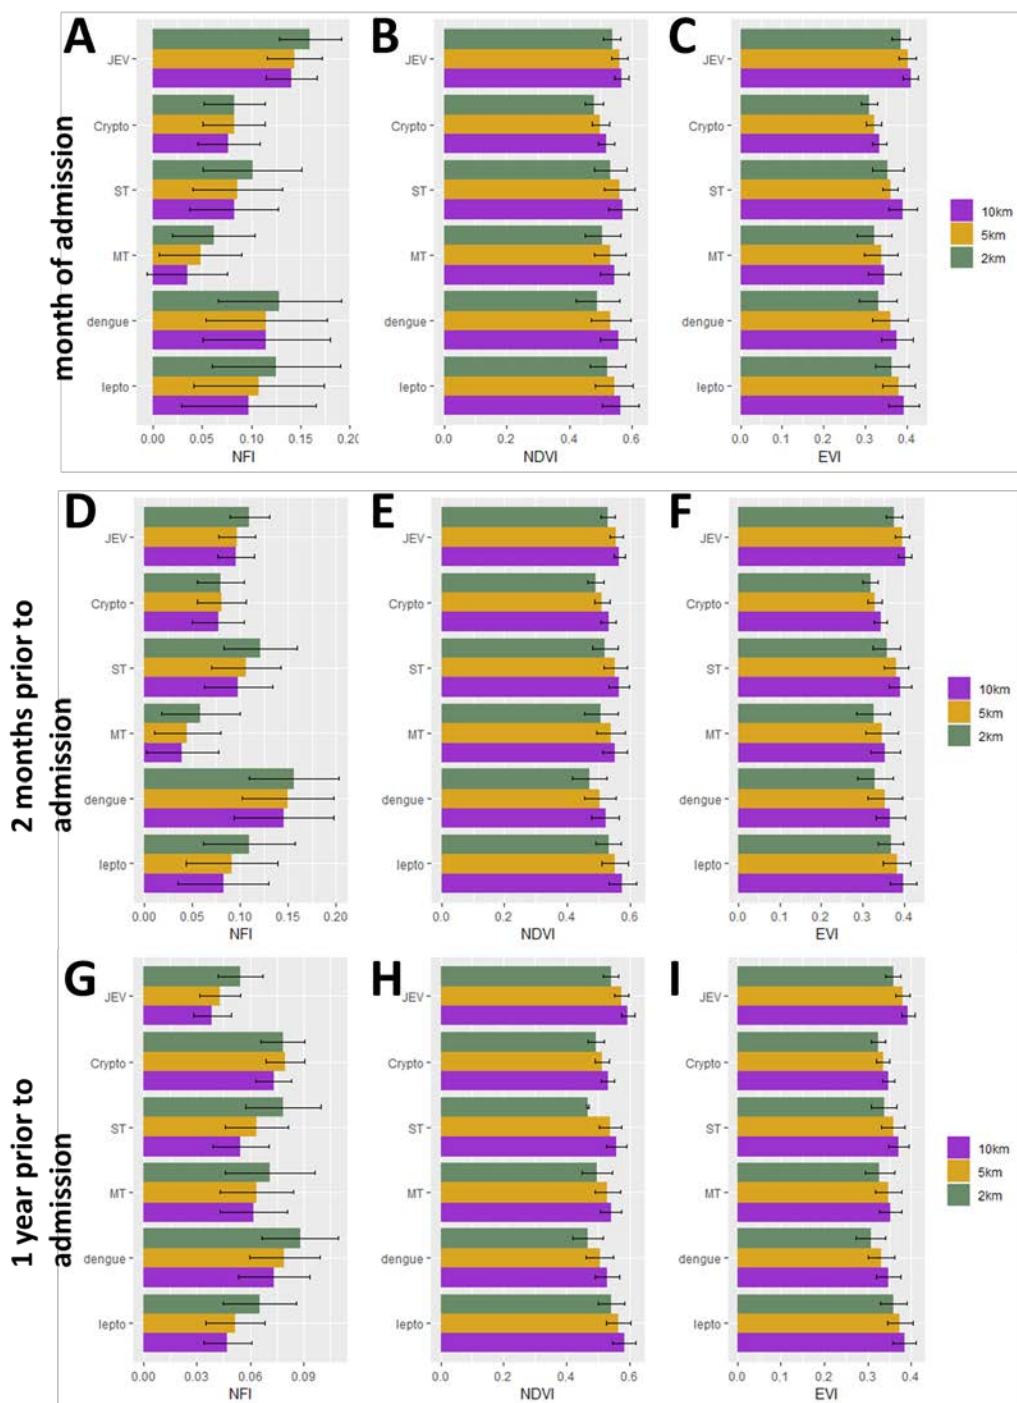

661

662

## SUPPORTING MATERIALS

### 663 Supporting Materials I: Diagnosis of major infectious agents

664 A detailed report of the data collection and primary analysis can be found in [14]. Cerebrospinal  
665 fluid (CSF) was taken from all patients consenting to be included in this study (approximately  
666 2.5 mL for children < 1yo; 3.5 mL for children 1 – 14yo; and 8 mL for patients  $\geq$  15yo). A  
667 venous blood sample was also taken on the same day as the lumbar puncture (approximately 5.5  
668 mL for patients > 15yo; 10 mL for children 1 – 14yo; and 18.5 mL for patients  $\geq$  15yo). When  
669 possible follow-up serum samples were collected between 7 and 10 days post LP. All patient  
670 samples were analyzed using a panel of tests, including complete blood count; culture;  
671 biochemistry panel; and both serological and molecular assays for a range of fungi, parasites,  
672 viruses, and bacteria.

673 We considered sample size, natural history, and ecology of infections for selecting pathogens for  
674 this secondary analysis. Detections of the pathogens included in this analysis are as follows:

- 675 • *Japanese encephalitis virus* (JEV) infections were detected using ELISA IgM (Japanese  
676 Encephalitis/Dengue IgM Combo ELISA from Panbio) in CSF, and in serum at both  
677 admission and follow-up. Patients who were negative at admission but seropositive in a  
678 follow-up were classified as confirmed JEV infections. Some JEV infections were also  
679 diagnosed by culture or PCR.
- 680 • *Cryptococcus* spp. infections were detected using Indian ink stain of CSF; *Cryptococcus*  
681 Antigen Latex Agglutination Test with CSF (when HIV infection was suspected); and  
682 culture on Sabouraud agar when Indian ink test was positive or HIV infection was  
683 suspected.
- 684 • *Dengue virus* infections were detected using Hydrolysis probe real time RT-PCR [37] in  
685 CSF and serum; NS1 ELISA (Dengue Early ELISA from Panbio) in CSF and serum; and  
686 ELISA IgM (Japanese Encephalitis/Dengue IgM Combo ELISA from Panbio) in CSF,  
687 and in serum at both admission and follow-up (if negative at admission but seropositive  
688 in a follow-up).
- 689 • *Flavivirus* infections were detected using nested SYBR Green real-time RT-PCR in CSF  
690 and serum [38,39].
- 691 • *Rickettsia* spp. infections were detected using Hydrolysis probe RT-PCR in CSF [40,41];  
692 Hydrolysis probe real time PCR and conventional PCR from buffy coat; and genetic  
693 sequencing.
- 694 • *R. typhi* and *Orientia tsutsugamushi* infections were detected using Hydrolysis probe real  
695 time PCR in CSF [40,41]; Hydrolysis probe real time PCR from buffy coat; and IgM and  
696 IgG assays from admission and follow-up serum (if there was a  $\geq$  4-fold rise in antibody  
697 at follow-up) [42].
- 698 • *Leptospira* spp. infections were detected using hydrolysis probe real-time PCR in CSF  
699 [43]; culturing of blood clot on EMJH medium; microscopic agglutination tests at

700 admission and follow-up (if there was a  $\geq 4$ -fold rise in antibody at follow-up)[44]; and  
701 hydrolysis probe real time RT-PCR from buffy coat [43].

702 The final etiology was determined based on the panel of diagnostic tests, including direct  
703 detection of pathogens in CSF or blood, IgM in CSF, seroconversion, or a 4-fold increase in  
704 antibody titer between the date of admission and follow-up serum samples. When more than 1  
705 pathogen was present, direct tests were prioritized over indirect tests and presence in the CSF  
706 was prioritized over presence in the blood.

707

708

709

710

711

712

713

714

715

716

717

718

719

720

721

722

723

724

725

726

## 727 Supporting Materials II: Spatial point patterns

728 The spatial distribution of villages from which study patients originated were indicated through  
729 maps of village locations, standard distance deviations (SDDs), and standard deviational ellipses  
730 (SDEs). Both SDDs and SDEs provide a visual representation of the central tendency and spread  
731 of points across a landscape [45,46]. SDEs also indicate potential anisotropy.

732 The SDD gives an indication of how points deviate from the mean center. The formula for the  
733 SDD is:

734

$$735 \quad SDD = \sqrt{\frac{\sum_{i=1}^n (x_i - X_{MC})^2 + \sum_{i=1}^n (y_i - Y_{MC})^2}{n}}$$

736

737 where  $x_i$  and  $y_i$  are geographic references for point  $i$ ;  
738  $\{X_{MC}, Y_{MC}\}$  is the geometric mean center (MC) for the features.

739

740 The SDE differs from the SDD in that the X- and Y-axes are calculated separately and the  
741 orientation is not necessarily horizontal/vertical. The Y-axis is rotated clockwise until the sum of  
742 the squares of the distances between points (village locations) and axes are minimized. The angle  
743 is defined as:

744

745  $\theta$

$$746 \quad = \arctan \left\{ \frac{[\sum_{i=1}^n (x_i - X_{MC})^2 - \sum_{i=1}^n (y_i - Y_{MC})^2] + \sqrt{[\{\sum_{i=1}^n (x_i - X_{MC})^2 - \sum_{i=1}^n (y_i - Y_{MC})^2\}^2 + 4\{\sum_{i=1}^n (x_i - X_{MC})(y_i - Y_{MC})\}^2]}}{2 \sum_{i=1}^n (x_i - X_{MC})(y_i - Y_{MC})} \right\}$$

747

748 The standard deviation is then calculated along both the shifted X- and Y-axes:

$$749 \quad s_X = \sqrt{\frac{\sum_{i=1}^n [(x_i - X_{MC}) \cos \theta - (y_i - Y_{MC}) \sin \theta]^2}{n}}$$

750

$$751 \quad s_Y = \sqrt{\frac{\sum_{i=1}^n [(x_i - X_{MC}) \sin \theta + (y_i - Y_{MC}) \cos \theta]^2}{n}}$$



752  
753  
754  
755  
756  
757  
758  
759  
760  
761  
762  
763  
764  
765  
766  
767  
768  
769  
770  
771  
772  
773  
774  
775  
776  
777  
778

The output of these statistics is traditionally mapped as an ellipse; with 1, 2, or 3 standard deviations (roughly corresponding to 63, 98, or 99 % of all geographic points, respectively). Spatial point patterns that are isotropic will result in an SDE that is equal to the standard distance deviation (SDD), resulting in a circular map layer rather than an ellipse.

Both the SDD and SDE can be weighted (for example, if multiple cases come from a single location).

### 779 **Supporting Materials III: Environmental Indices (EIs)**

780 The photosynthetic components of vegetation (i.e. chlorophyll) absorb visible light, especially in  
781 the Red and Blue wavelengths. Conversely, most infrared radiation is reflected by healthy  
782 vegetation. The contrast between Red and near-infrared (NIR) responses therefore provides an  
783 estimate of healthy vegetation.

784 One common measure of landscape vegetation is the normalized difference vegetation index  
785 (NDVI [47]) which is frequently defined as:

$$786 \quad NDVI = \frac{NIR - Red}{NIR + Red}$$

787 .

788 This simple measurement is sensitive to atmospheric effects and dense canopy structure [48].  
789 While NIR can pass through multiple layers of canopy structure, Red typically cannot. In areas  
790 with high vegetation density NDVI quickly becomes saturated. An improved metric has been  
791 developed to account for these problems, referred to as the enhanced vegetation index (EVI  
792 [49]). This metric uses the difference between Red and Blue reflectances as an estimator of  
793 atmospheric influence level on the vegetation index. EVI is commonly specified as:

794

$$795 \quad EVI = G \frac{NIR - Red}{NIR + C_1 Red - C_2 Blue + L}$$

796

797 ; where  $L$  is the canopy background adjustment;  
798  $C_1$  and  $C_2$  are coefficients of an aerosol resistance term;  
799 and  $G$  is a scaling factor.

800

801 A variety of similar indices have been proposed to measure water content, either within  
802 vegetation (i.e. measuring drought conditions or identifying areas that have been burned) or as  
803 surface water. In general, indices that use a combination of NIR and shortwave infrared  
804 responses (SWIR) have been proposed to measure within-vegetation water content whereas those  
805 that use a combination of visible spectral regions (VIS) and SWIR are usually proposed for  
806 identifying water bodies.

807 Almost all include a SWIR component because infrared in these wavelengths are well- absorbed  
808 by water (see [50], for example). Following Boschetti et al [51] we use the following normalized  
809 flooding index (NFI):

810 
$$NFI = \frac{Red - SWIR2}{Red + SWIR2}$$

811 ; where SWIR2 is shortwave infrared radiation 2 (~ 1640nm).

812

813

814

815

816

817

818

819

820

821

822

823

824

825

826

827

828

829

830

831

832

833

## 834 **Supporting Materials IV: Statistical model selection**

835 Formal multivariable analysis was conducted on both the village- and individual-level datasets.  
836 Small case numbers for mono-infections limited our multivariable analyses to an analysis of  
837 study patient home villages and comparison villages as well as the most commonly diagnosed  
838 infection: JEV. The village-level data were coded as a “1” or “0” based on whether or not the  
839 village was home to an study patient; and whether or not the village was home to an study patient  
840 diagnosed with JEV. The individual-level dataset was likewise coded with a “1” or “0” based on  
841 whether or not the individual was diagnosed with a JEV infection (all patients in the individual-  
842 level data had an LP).

843 We began with an exploratory multivariable analysis using generalized additive models (GAMs)  
844 with a binomial distribution (logistic GAMs). The use of GAMs allowed us to explore the  
845 potentially non-linear shape of the association between continuous environmental predictors  
846 (NDVI, EVI, and NFI) and the outcome variables and informed our final model selection and  
847 variable specification.

848 Our first GAMs included both NDVI and EVI, which are considered complimentary to each  
849 other [49]. The models showed a high degree of concavity between these two covariates, almost  
850 no added benefit (from model fit statistics), and no detectable effect of the NDVI covariate. In  
851 subsequent models we therefore retained only EVI as a measure of vegetation.

852 Village-level GAMs began with village geographic (elevation, distance to nearest major road)  
853 and demographic (village population size) covariates. A second model was then specified  
854 including the environmental covariates at the 2km buffer size around each village. Subsequent  
855 models tested larger buffer sizes (5km and 10km), investigating overall model fit using the  
856 Akaike Information Criterion (AIC) and the explained deviance. The smoothed functions were  
857 chosen using restricted maximum likelihood (REML).

858 The village-level GAM for all study patients (that is, all patients who had an LP regardless of  
859 diagnosis) showed statistically significant contributions from NFI, EVI, village population,  
860 distance to the nearest major road, and elevation. The effects of NFI, EVI, and village population  
861 were positive while the effects for distance to the nearest major road and elevation were  
862 negative. The effects for NFI, EVI, village population, and elevation all appeared curvilinear.  
863 The village level model for JEV villages (villages from which LP patients who were diagnosed  
864 with JEV came) indicated that only village population was a significant predictor, with a  
865 curvilinear effect.

866 Individual-level models began with village- (village population, elevation, distance to the nearest  
867 major road) and individual- (age, gender, admission quarter and year) level variables.  
868 Environmental variables were first added at the 2km buffer size and for the year prior to  
869 admission. Subsequent models tested larger buffer sizes until the AIC was minimized. The 10km  
870 buffer appeared to provide the best model fit. The temporal resolution was then varied at the

871 10km buffer size, beginning with 1 year mean prior to admission, then 2 months mean prior to  
872 admission, and finally within the same month as admission. The best fitting model appeared to  
873 be the 10km buffer and measures from the same month as admission.

874 Both NFI and EVI show seasonal variations and calendar month is a strong predictor of NFI. In  
875 order to account for concurvity in the GAMs and collinearity in the subsequent logistic  
876 generalized linear models, we transformed the environmental variables to quartiles for  
877 subsequent models. This transformation allows for easy interpretation of covariate effects, allows  
878 for non-linear associations between the covariate and the outcome of interest, and allows the  
879 model to simultaneously address both the seasonality in cases (especially JEV) and the apparent  
880 associations with surface water (NFI).

881 All other continuous variables were centered on their means and standardized by their standard  
882 deviations.

883 The final village-level model was a logistic regression and the final individual-level model was a  
884 mixed effects logistic regression, with a random intercept for village, both using these  
885 transformed and standardized variables.

886

887

888

889

890

891

892

893

894

895

896

897

898

899

900

## SUPPORTING FIGURES

901

902 **Supporting Figure 1:** Diagram of data processing and aggregation. Four different data sources  
903 are used (indicated by boxes with dashed lines). Two main datasets are created from the  
904 combined sources (indicated by boxes shaded in grey): an individual-level dataset (one row per  
905 patient) and a village-level dataset (one row per village). NDVI indicates the normalized  
906 differential vegetation index, EVI indicates the enhanced vegetation index, and NFI indicates the  
907 normalized flooding index.

908

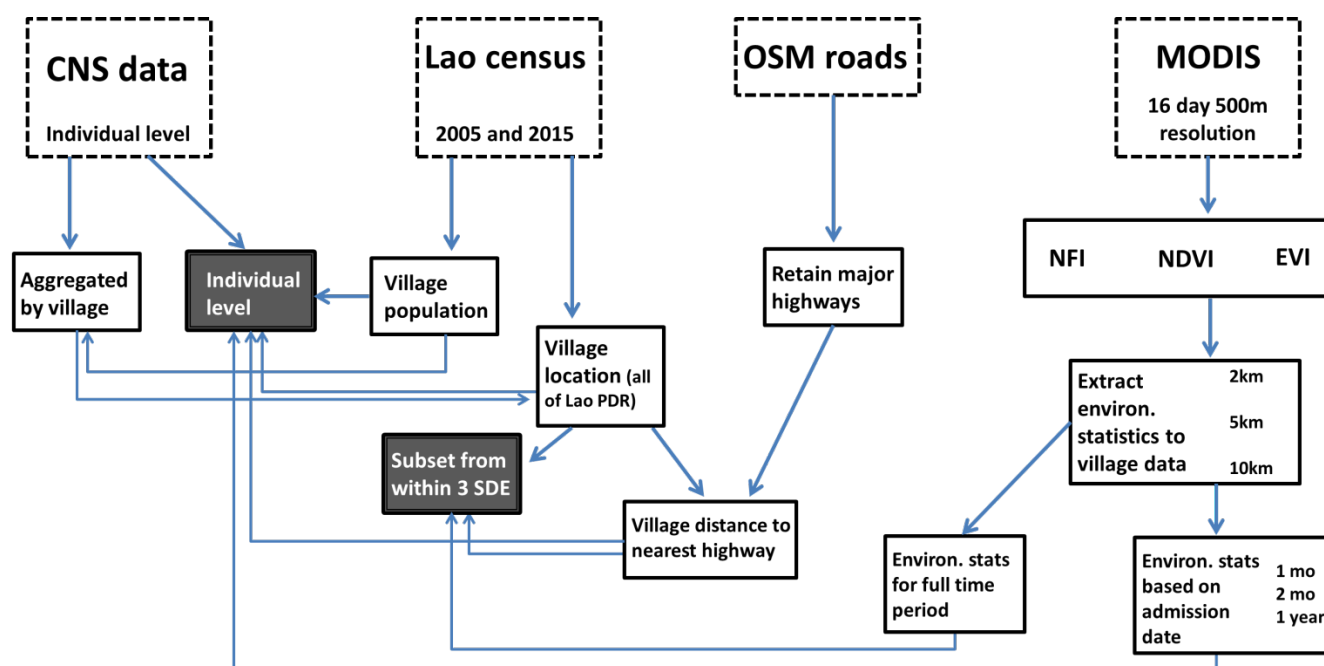

909

910

911

912

913

914

915

916

917

918 **Supporting Figure 2:** Subset of villages selected for village level analysis. A standard  
919 deviational ellipse ((SDE) with 3 standard deviations) was drawn around the home villages of all  
920 LP patients. All villages within that SDE were selected for the village level analysis.

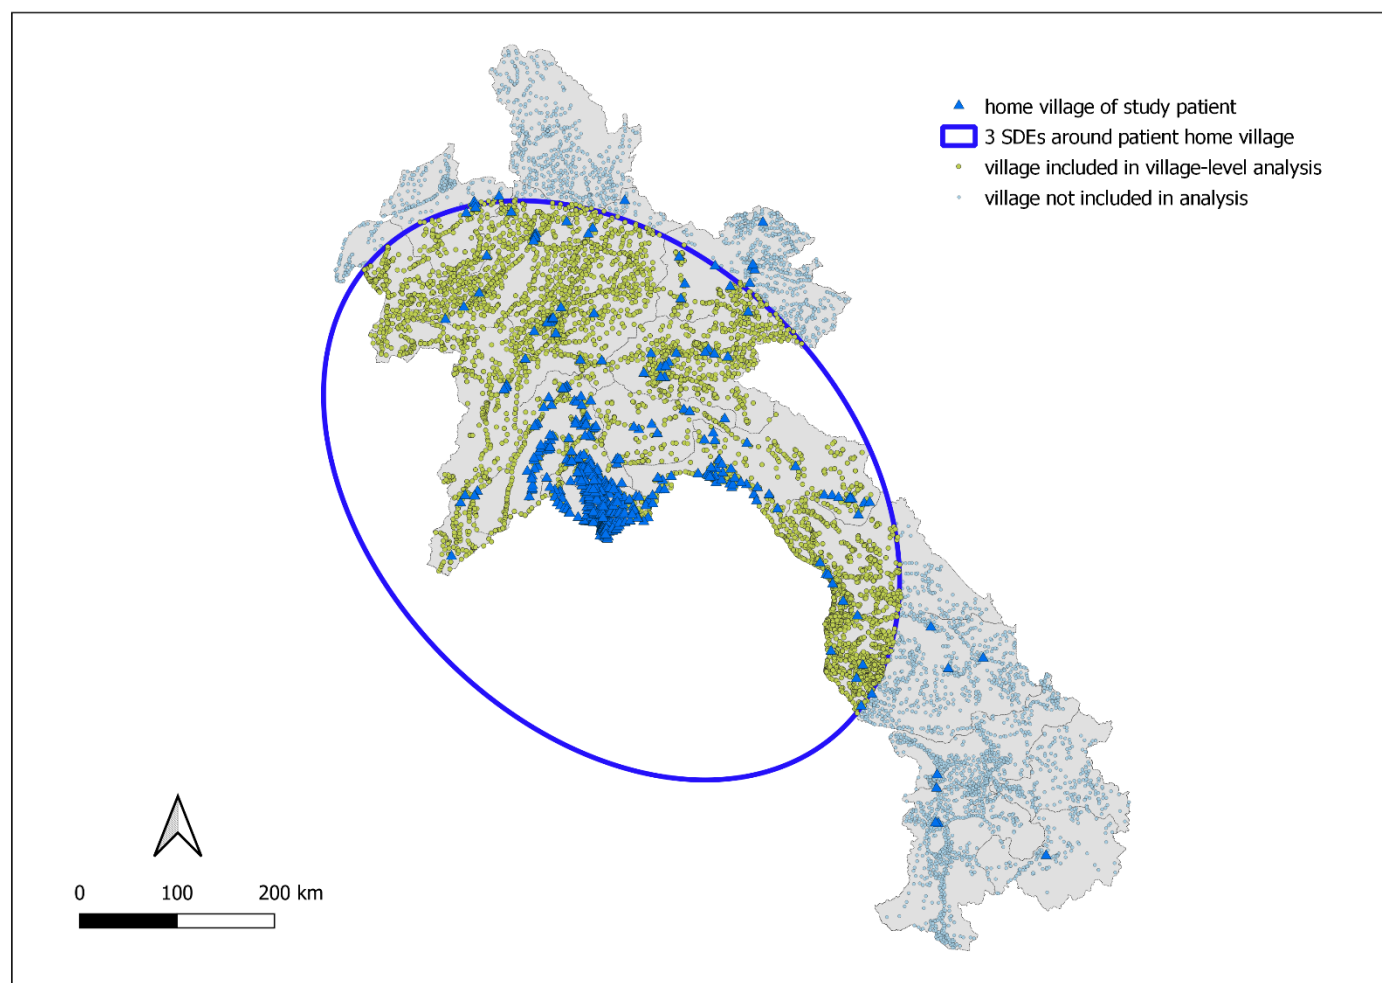

921  
922  
923  
924  
925  
926  
927  
928  
929

930 **Supporting Figure 3:** Major roads (dark black lines) downloaded from OpenStreetMaps (2017)  
931 for use in calculating the Euclidian distance from each village to the nearest major road. Roads  
932 included “primary”, “secondary”, and all major connecting roads.

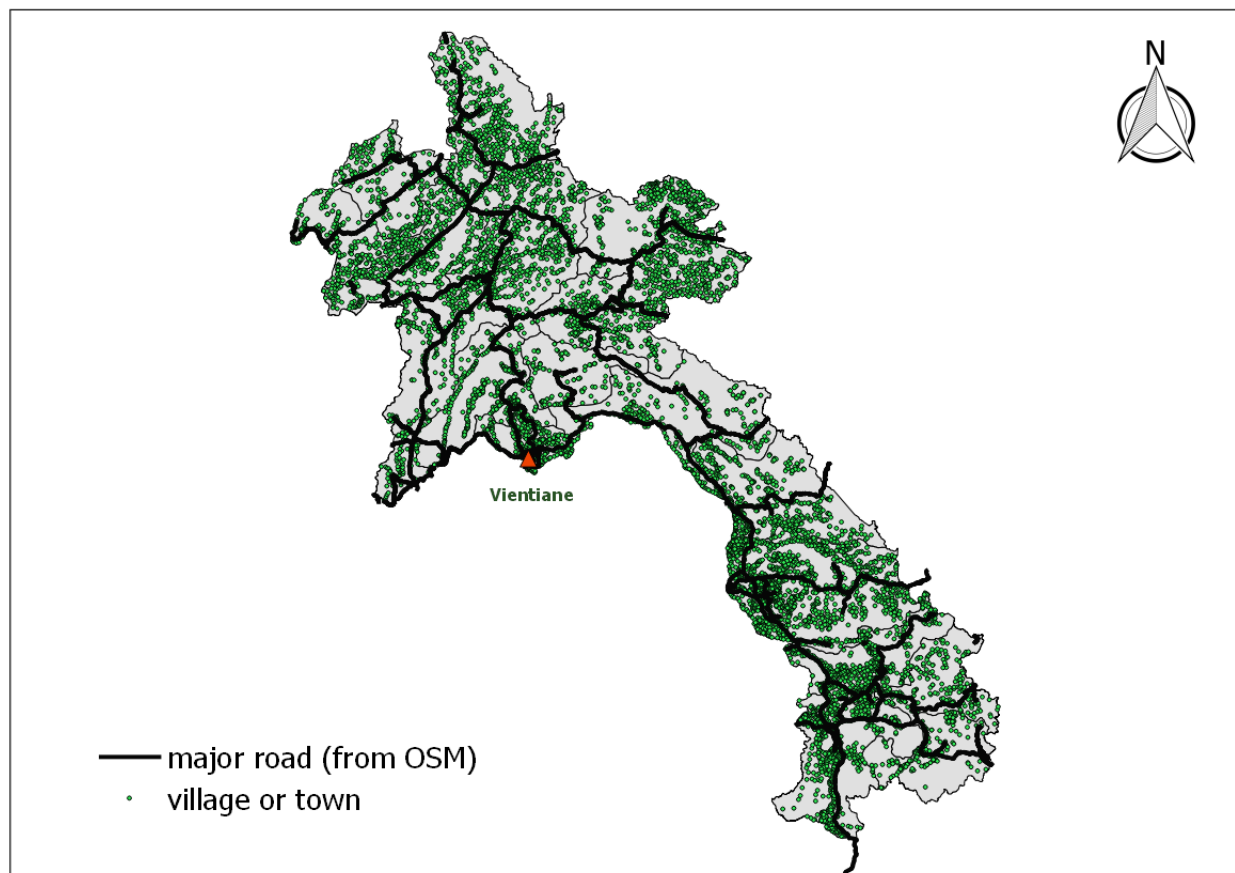

933  
934  
935  
936  
937  
938  
939  
940  
941  
942  
943



944 **Supporting Figure 4:** Mean village population (and 95% CI) by diagnosis

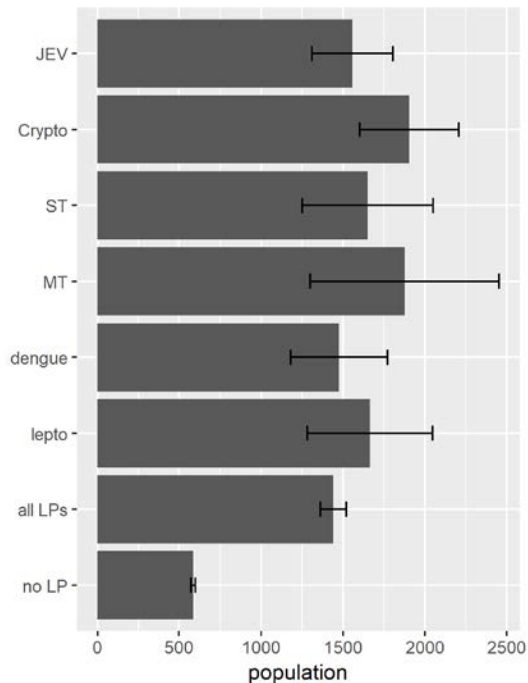

945

946

947 **Supporting Figure 5:** Mean village elevation (and 95% CI) by LP diagnosis

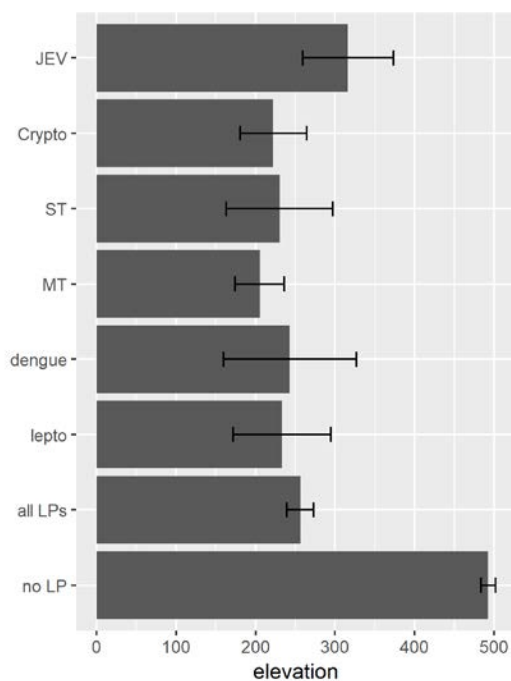

948

949
